# Supplementary material
Source: PubMed Central journal article supplement (PMC6441942)
Supplement: jm8b01328_si_001.pdf [file jm8b01328_si_001.pdf]

## Supplementary Information

### **Structure-Based in Silico Screening Identifies a Potent Ebolavirus Inhibitor from a Traditional Chinese Medicine Library**

Faraz Shaikh, Yuguang Zhao<sup>ORCID</sup>, Luis Alvarez, Maria Iliopoulou, Christopher Lohans,  
Christopher J. Schofield<sup>ORCID</sup>, Sergi Padilla-Parra<sup>ORCID</sup>, Shirley W. I. Siu<sup>ORCID</sup>, Elizabeth E. Fry<sup>ORCID</sup>,  
Jingshan Ren<sup>ORCID</sup> and David I. Stuart<sup>ORCID</sup>

**This document includes:**

**Supporting Information Figures 1 – 3**

**Supporting Information Tables 1 – 4**

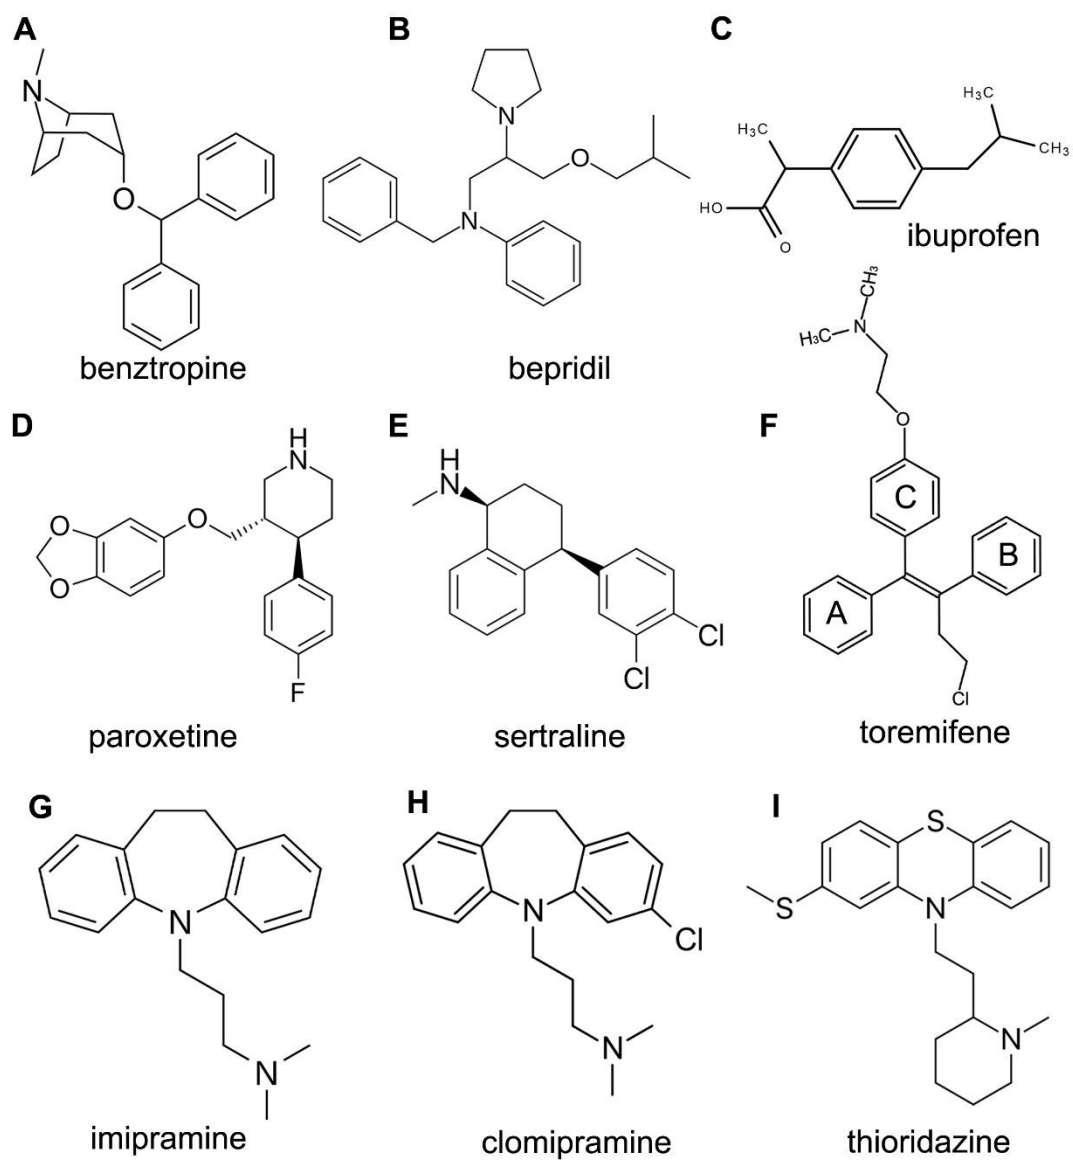

**Figure S1.** Chemical structures of approved drugs known to bind EBOV GP. Crystal structures of these nine drugs in complexes with EBOV GP have been previously reported.

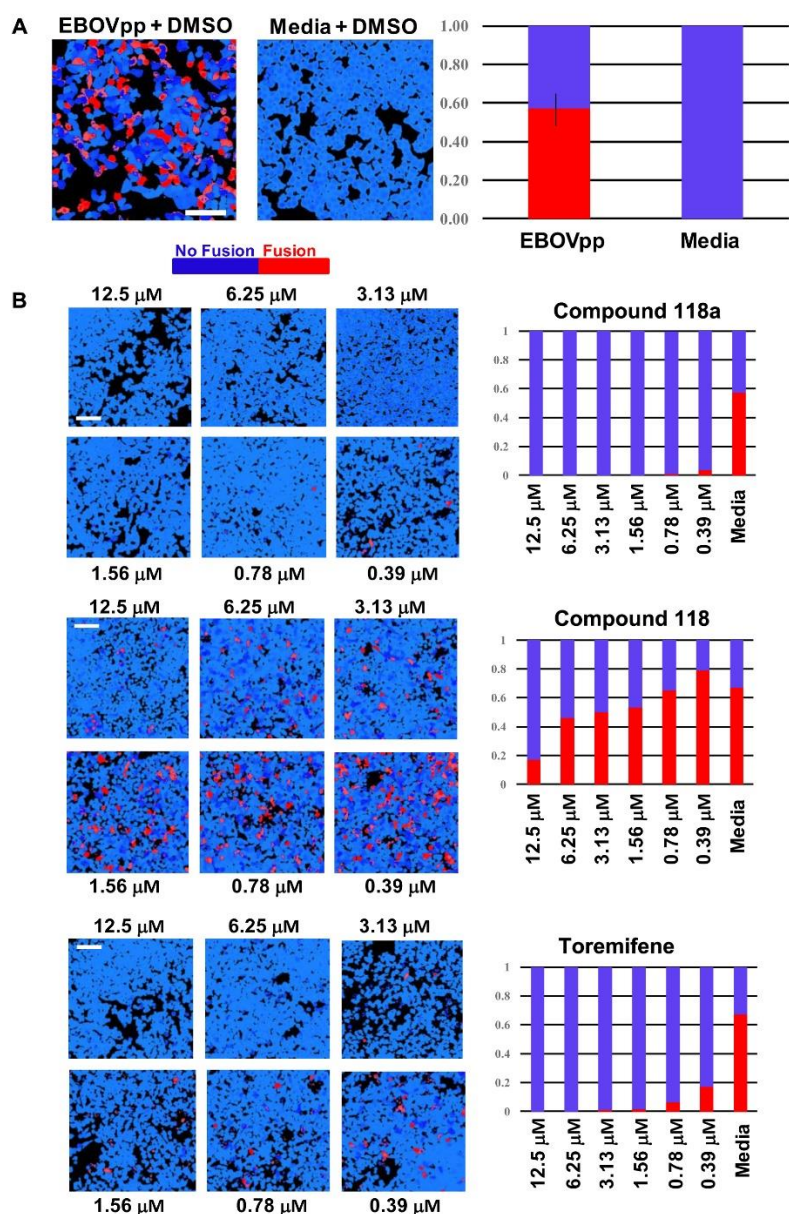

**Figure S2.** Compound **118a** is a potent and specific inhibitor of EBOVpp fusion in live cells. Fusion assays were carried out using a  $\beta$ -lactamase based reporter assay with different dilutions of **118a**, **118** and toremifene. (A) TZM-bl cells exposed to EBOVpp and media are shown, images were pseudocolored with red (fusion positive) and blue (fusion negative), error bar 10  $\mu$ M. The bar diagram show the total proportion of fusion positive cells (57%  $\pm$ 14) for TZM-bl cells exposed to EBOVpp (0.5 MOI) and Media (0%). (B) TZM-bl cells exposed to EBOVpp and **118a**, **118** and toremifene. Error bars showing the extent of fusion for each concentration of the corresponding compounds, error bar 20  $\mu$ M.

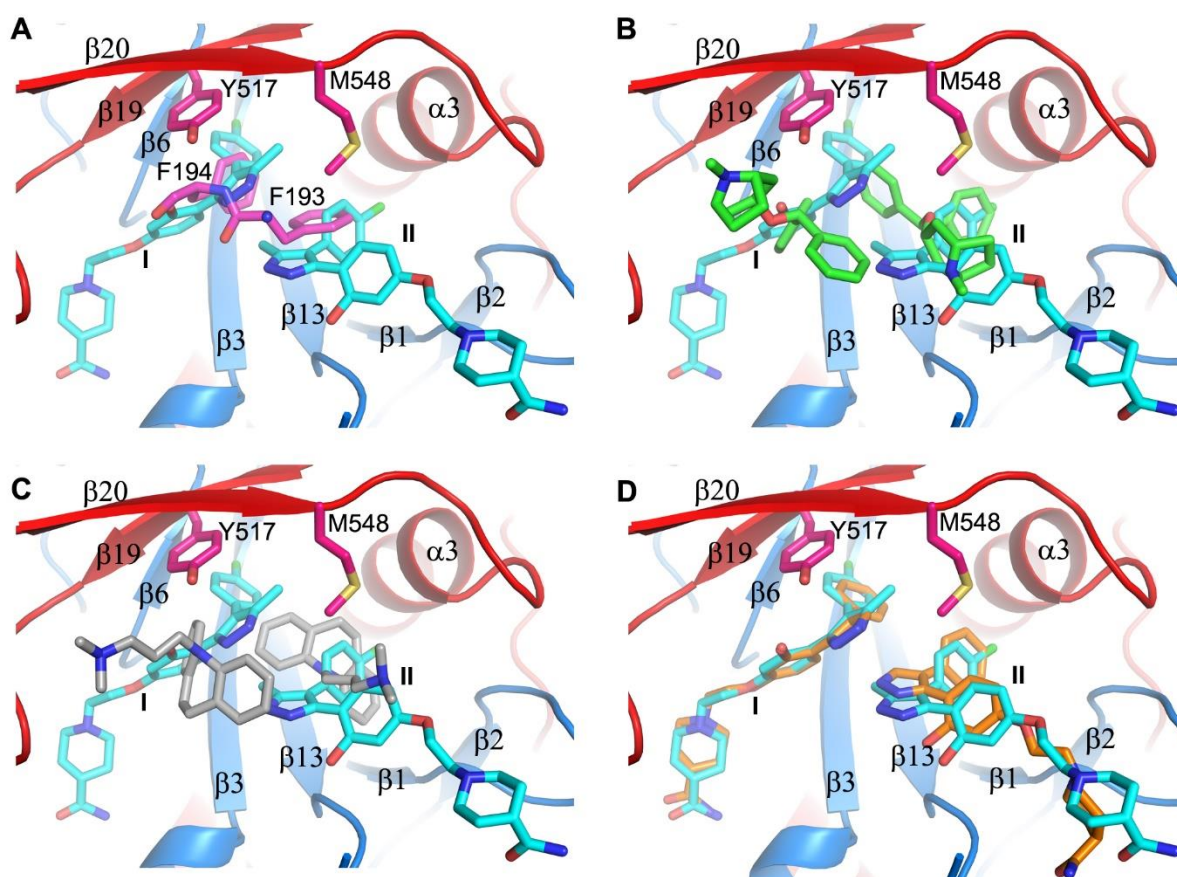

**Figure S3.** Comparison of binding modes of inhibitors that have two molecules bound in the GP cavity (these are labelled I and II, with I being the most internal). (A) The positions and orientations of the bound **118a** molecules are compared with F193 and F194 (magenta sticks) in the apo GP structure. (B to D) Overlays of bound benztropine (green sticks in (B)), imipramine (grey sticks in (C)) and compound **118** (orange sticks in (D)) molecules with **118a**. The superimpositions were done using protein C $\alpha$  atoms only. In all panels protein structure shown is GP-**118a** with main-chain as ribbons (GP1 in blue and GP2 in red). For clarity, only side-chains of Y517 and M548 (red sticks) are shown to mark the relative position of the bound inhibitors.

**Table S1.** Glide and QPLD docking scores of known EBOV GP binders. pIC<sub>50</sub> values are converted from the IC<sub>50</sub>s obtained from virus infection assays in vero E6 cells (reference 10).

| <b>Drug</b>         | <b>Glide Emodel<br/>(kcal/mol)</b> | <b>QPLD Emodel<br/>(kcal/mol)</b> | <b>pIC<sub>50</sub><br/>(-log<sub>10</sub> M)</b> |
|---------------------|------------------------------------|-----------------------------------|---------------------------------------------------|
| <b>Toremifene</b>   | -67.733                            | -77.125                           | 6.79                                              |
| <b>Bepriidil</b>    | -50.37                             | -55.746                           | 5.29                                              |
| <b>Benztropine</b>  | -47.379                            | -53.416                           | 5.09                                              |
| <b>Paroxetine</b>   | -45.973                            | -51.792                           | 5.13                                              |
| <b>Imipramine</b>   | -61.331                            | -44.892                           | 4.86                                              |
| <b>Clomipramine</b> | -44.13                             | -44.209                           | 4.94                                              |
| <b>Thioridazine</b> | -38.835                            | -44.026                           | 5.20                                              |
| <b>Sertraline</b>   | -28.265                            | -31.91                            | 5.50                                              |

**Table S2.** Glide XP and QPLD docking scores of top 16 natural compounds from *In silico* screening. About 2.5 million compounds in the ZINC natural compound library from the Traditional Chinese Medicine database@Taiwan have been screened (reference 27). All the top 16 hits have passed PAINS-Remover (reference 28). The docking results for toremifene are included for comparison. Compounds selected for *in vitro* experiment are marked with an asterisk.

| <b>Chemical ID</b>          | <b>Glide XP Score (kcal/mol)</b> | <b>Glide XP Emodel (kcal/mol)</b> | <b>QPLD Score (kcal/mol)</b> | <b>QPLD Emodel (kcal/mol)</b> | <b>Ligand efficiency score (kcal/mol)</b> |
|-----------------------------|----------------------------------|-----------------------------------|------------------------------|-------------------------------|-------------------------------------------|
| <b>NP-005129</b>            | -12.582                          | -79.021                           | -12.53                       | -75.31                        | -0.307                                    |
| <b>NP-016821</b>            | -12.465                          | -77.247                           | -11.67                       | -83.967                       | -0.296                                    |
| <b>NP-019105</b>            | -11.006                          | -58.284                           | -9.407                       | -64.866                       | -0.297                                    |
| <b>*ZINC32540717 (118)</b>  | -10.851                          | -70.036                           | -11.029                      | -73.801                       | -0.346                                    |
| <b>*ZINC00167626</b>        | -10.894                          | -37.646                           | -9.143                       | -47.781                       | -0.545                                    |
| <b>ZINC 32540716</b>        | -10.781                          | -71.098                           | -10.645                      | -84.044                       | -0.333                                    |
| <b>*ZINC09410451 (118a)</b> | -9.210                           | -58.141                           | -9.210                       | -78.738                       | -0.288                                    |
| <b>NP-001471</b>            | -10.398                          | -54.738                           | -12.19                       | -70.721                       | -0.334                                    |
| <b>554127</b>               | -10.348                          | -37.327                           | -11.222                      | -59.189                       | -0.470                                    |
| <b>ZINC35464211</b>         | -10.127                          | -64.476                           | -9.887                       | -60.507                       | -0.316                                    |
| <b>*ZINC00407254</b>        | -9.869                           | -44.638                           | -9.65                        | -57.035                       | -0.539                                    |
| <b>*ZINC12893941</b>        | -9.791                           | -39.059                           | -9.187                       | -51.477                       | -0.484                                    |
| <b>*ZINC04772639</b>        | -9.341                           | -49.893                           | -9.283                       | -55.833                       | -0.404                                    |
| <b>ZINC05071941</b>         | -9.275                           | -41.034                           | -9.323                       | -49.881                       | -0.459                                    |
| <b>*ZINC11865143</b>        | -9.351                           | -40.886                           | -9.292                       | -53.402                       | -0.457                                    |
| <b>*ZINC00056827</b>        | -8.166                           | -42.016                           | -9.694                       | -42.819                       | -0.606                                    |
| <b>Toremifene</b>           | -8.413                           | -67.733                           | -8.670                       | -77.125                       | -0.299                                    |

**Table S3.** Coordinates of compound **118** docked with the EBOV GP (PDB ID 5JQ7).

|        |    |   |     |     |         |        |         |      |      |     |
|--------|----|---|-----|-----|---------|--------|---------|------|------|-----|
| HETATM | 1  | C | UNK | 900 | -47.581 | 11.604 | -11.973 | 0.00 | 0.00 | C   |
| HETATM | 2  | C | UNK | 900 | -48.422 | 11.198 | -10.946 | 0.00 | 0.00 | C   |
| HETATM | 3  | C | UNK | 900 | -48.109 | 11.514 | -9.626  | 0.00 | 0.00 | C   |
| HETATM | 4  | C | UNK | 900 | -46.925 | 12.190 | -9.316  | 0.00 | 0.00 | C   |
| HETATM | 5  | C | UNK | 900 | -46.088 | 12.603 | -10.356 | 0.00 | 0.00 | C   |
| HETATM | 6  | C | UNK | 900 | -46.432 | 12.331 | -11.680 | 0.00 | 0.00 | C   |
| HETATM | 7  | C | UNK | 900 | -46.599 | 12.453 | -7.882  | 0.00 | 0.00 | C   |
| HETATM | 8  | C | UNK | 900 | -46.853 | 11.617 | -6.802  | 0.00 | 0.00 | C   |
| HETATM | 9  | N | UNK | 900 | -46.388 | 12.274 | -5.698  | 0.00 | 0.00 | N   |
| HETATM | 10 | H | UNK | 900 | -46.425 | 11.919 | -4.752  | 0.00 | 0.00 | H   |
| HETATM | 11 | N | UNK | 900 | -45.860 | 13.464 | -5.990  | 0.00 | 0.00 | N   |
| HETATM | 12 | C | UNK | 900 | -45.976 | 13.580 | -7.297  | 0.00 | 0.00 | C   |
| HETATM | 13 | C | UNK | 900 | -45.498 | 14.811 | -7.976  | 0.00 | 0.00 | C   |
| HETATM | 14 | C | UNK | 900 | -46.441 | 15.669 | -8.542  | 0.00 | 0.00 | C   |
| HETATM | 15 | C | UNK | 900 | -46.024 | 16.798 | -9.241  | 0.00 | 0.00 | C   |
| HETATM | 16 | C | UNK | 900 | -44.659 | 17.102 | -9.352  | 0.00 | 0.00 | C   |
| HETATM | 17 | C | UNK | 900 | -43.725 | 16.241 | -8.782  | 0.00 | 0.00 | C   |
| HETATM | 18 | C | UNK | 900 | -44.135 | 15.097 | -8.106  | 0.00 | 0.00 | C   |
| HETATM | 19 | O | UNK | 900 | -43.182 | 14.258 | -7.600  | 0.00 | 0.00 | O   |
| HETATM | 20 | O | UNK | 900 | -44.156 | 18.178 | -10.051 | 0.00 | 0.00 | O   |
| HETATM | 21 | C | UNK | 900 | -44.909 | 19.385 | -10.134 | 0.00 | 0.00 | C   |
| HETATM | 22 | C | UNK | 900 | -44.392 | 20.350 | -9.065  | 0.00 | 0.00 | C   |
| HETATM | 23 | N | UNK | 900 | -45.309 | 21.593 | -8.926  | 0.00 | 0.00 | N1+ |
| HETATM | 24 | C | UNK | 900 | -44.909 | 22.324 | -7.626  | 0.00 | 0.00 | C   |
| HETATM | 25 | C | UNK | 900 | -45.863 | 23.502 | -7.411  | 0.00 | 0.00 | C   |
| HETATM | 26 | C | UNK | 900 | -45.783 | 24.502 | -8.585  | 0.00 | 0.00 | C   |
| HETATM | 27 | C | UNK | 900 | -46.079 | 23.784 | -9.928  | 0.00 | 0.00 | C   |
| HETATM | 28 | C | UNK | 900 | -45.193 | 22.539 | -10.150 | 0.00 | 0.00 | C   |
| HETATM | 29 | C | UNK | 900 | -46.719 | 25.713 | -8.337  | 0.00 | 0.00 | C   |
| HETATM | 30 | O | UNK | 900 | -47.616 | 26.017 | -9.117  | 0.00 | 0.00 | O   |
| HETATM | 31 | N | UNK | 900 | -46.509 | 26.453 | -7.251  | 0.00 | 0.00 | N   |
| HETATM | 32 | H | UNK | 900 | -47.828 | 11.370 | -12.999 | 0.00 | 0.00 | H   |
| HETATM | 33 | H | UNK | 900 | -49.309 | 10.629 | -11.170 | 0.00 | 0.00 | H   |
| HETATM | 34 | H | UNK | 900 | -48.786 | 11.199 | -8.851  | 0.00 | 0.00 | H   |
| HETATM | 35 | H | UNK | 900 | -45.171 | 13.134 | -10.145 | 0.00 | 0.00 | H   |
| HETATM | 36 | H | UNK | 900 | -45.795 | 12.663 | -12.487 | 0.00 | 0.00 | H   |
| HETATM | 37 | H | UNK | 900 | -47.309 | 10.640 | -6.721  | 0.00 | 0.00 | H   |
| HETATM | 38 | H | UNK | 900 | -47.497 | 15.452 | -8.457  | 0.00 | 0.00 | H   |
| HETATM | 39 | H | UNK | 900 | -46.783 | 17.408 | -9.703  | 0.00 | 0.00 | H   |
| HETATM | 40 | H | UNK | 900 | -42.674 | 16.468 | -8.887  | 0.00 | 0.00 | H   |
| HETATM | 41 | H | UNK | 900 | -42.295 | 14.518 | -7.856  | 0.00 | 0.00 | H   |
| HETATM | 42 | H | UNK | 900 | -45.988 | 19.265 | -10.061 | 0.00 | 0.00 | H   |
| HETATM | 43 | H | UNK | 900 | -44.728 | 19.809 | -11.122 | 0.00 | 0.00 | H   |
| HETATM | 44 | H | UNK | 900 | -43.372 | 20.690 | -9.265  | 0.00 | 0.00 | H   |
| HETATM | 45 | H | UNK | 900 | -44.399 | 19.850 | -8.096  | 0.00 | 0.00 | H   |
| HETATM | 46 | H | UNK | 900 | -43.869 | 22.643 | -7.731  | 0.00 | 0.00 | H   |
| HETATM | 47 | H | UNK | 900 | -44.974 | 21.602 | -6.814  | 0.00 | 0.00 | H   |
| HETATM | 48 | H | UNK | 900 | -46.882 | 23.125 | -7.290  | 0.00 | 0.00 | H   |
| HETATM | 49 | H | UNK | 900 | -45.598 | 23.986 | -6.472  | 0.00 | 0.00 | H   |
| HETATM | 50 | H | UNK | 900 | -44.784 | 24.942 | -8.621  | 0.00 | 0.00 | H   |
| HETATM | 51 | H | UNK | 900 | -47.129 | 23.485 | -9.961  | 0.00 | 0.00 | H   |
| HETATM | 52 | H | UNK | 900 | -45.943 | 24.476 | -10.762 | 0.00 | 0.00 | H   |
| HETATM | 53 | H | UNK | 900 | -44.138 | 22.800 | -10.255 | 0.00 | 0.00 | H   |
| HETATM | 54 | H | UNK | 900 | -45.516 | 21.983 | -11.030 | 0.00 | 0.00 | H   |
| HETATM | 55 | H | UNK | 900 | -47.111 | 27.244 | -7.095  | 0.00 | 0.00 | H   |
| HETATM | 56 | H | UNK | 900 | -45.812 | 26.192 | -6.555  | 0.00 | 0.00 | H   |
| HETATM | 57 | H | UNK | 900 | -46.283 | 21.294 | -8.851  | 0.00 | 0.00 | H   |

**Table S4.** Coordinates of compound **118a** docked with the EBOV GP (PDB ID 5JQ7).

|        |    |    |     |     |         |        |         |      |      |     |
|--------|----|----|-----|-----|---------|--------|---------|------|------|-----|
| HETATM | 1  | C1 | UNK | 900 | -48.141 | 11.598 | -12.609 | 0.00 | 0.00 | C1  |
| HETATM | 2  | O  | UNK | 900 | -43.308 | 18.223 | -9.872  | 0.00 | 0.00 | O   |
| HETATM | 3  | O  | UNK | 900 | -42.932 | 24.629 | -9.642  | 0.00 | 0.00 | O   |
| HETATM | 4  | O  | UNK | 900 | -42.364 | 15.448 | -6.205  | 0.00 | 0.00 | O   |
| HETATM | 5  | N  | UNK | 900 | -45.309 | 21.404 | -9.352  | 0.00 | 0.00 | N1+ |
| HETATM | 6  | N  | UNK | 900 | -43.309 | 25.525 | -7.651  | 0.00 | 0.00 | N   |
| HETATM | 7  | N  | UNK | 900 | -43.853 | 13.093 | -5.902  | 0.00 | 0.00 | N   |
| HETATM | 8  | N  | UNK | 900 | -44.757 | 12.194 | -5.259  | 0.00 | 0.00 | N   |
| HETATM | 9  | C  | UNK | 900 | -45.008 | 22.406 | -10.487 | 0.00 | 0.00 | C   |
| HETATM | 10 | C  | UNK | 900 | -44.712 | 21.872 | -8.002  | 0.00 | 0.00 | C   |
| HETATM | 11 | C  | UNK | 900 | -45.162 | 24.297 | -8.714  | 0.00 | 0.00 | C   |
| HETATM | 12 | C  | UNK | 900 | -45.612 | 23.778 | -10.109 | 0.00 | 0.00 | C   |
| HETATM | 13 | C  | UNK | 900 | -45.361 | 23.215 | -7.623  | 0.00 | 0.00 | C   |
| HETATM | 14 | C  | UNK | 900 | -44.909 | 19.962 | -9.749  | 0.00 | 0.00 | C   |
| HETATM | 15 | C  | UNK | 900 | -43.706 | 24.831 | -8.712  | 0.00 | 0.00 | C   |
| HETATM | 16 | C  | UNK | 900 | -43.470 | 19.547 | -9.383  | 0.00 | 0.00 | C   |
| HETATM | 17 | C  | UNK | 900 | -43.661 | 17.233 | -9.020  | 0.00 | 0.00 | C   |
| HETATM | 18 | C  | UNK | 900 | -42.806 | 16.811 | -8.063  | 0.00 | 0.00 | C   |
| HETATM | 19 | C  | UNK | 900 | -44.908 | 16.539 | -9.251  | 0.00 | 0.00 | C   |
| HETATM | 20 | C  | UNK | 900 | -44.256 | 14.816 | -7.610  | 0.00 | 0.00 | C   |
| HETATM | 21 | C  | UNK | 900 | -44.496 | 13.606 | -7.023  | 0.00 | 0.00 | C   |
| HETATM | 22 | C  | UNK | 900 | -45.478 | 12.555 | -7.300  | 0.00 | 0.00 | C   |
| HETATM | 23 | C  | UNK | 900 | -43.074 | 15.654 | -7.188  | 0.00 | 0.00 | C   |
| HETATM | 24 | C  | UNK | 900 | -45.174 | 15.397 | -8.603  | 0.00 | 0.00 | C   |
| HETATM | 25 | C  | UNK | 900 | -45.655 | 11.772 | -6.218  | 0.00 | 0.00 | C   |
| HETATM | 26 | C  | UNK | 900 | -46.167 | 12.339 | -8.602  | 0.00 | 0.00 | C   |
| HETATM | 27 | C  | UNK | 900 | -46.504 | 10.559 | -5.918  | 0.00 | 0.00 | C   |
| HETATM | 28 | C  | UNK | 900 | -47.468 | 11.831 | -8.672  | 0.00 | 0.00 | C   |
| HETATM | 29 | C  | UNK | 900 | -45.492 | 12.603 | -9.799  | 0.00 | 0.00 | C   |
| HETATM | 30 | C  | UNK | 900 | -48.078 | 11.597 | -9.902  | 0.00 | 0.00 | C   |
| HETATM | 31 | C  | UNK | 900 | -46.109 | 12.398 | -11.029 | 0.00 | 0.00 | C   |
| HETATM | 32 | C  | UNK | 900 | -47.394 | 11.884 | -11.081 | 0.00 | 0.00 | C   |
| HETATM | 33 | H  | UNK | 900 | -46.323 | 21.379 | -9.251  | 0.00 | 0.00 | H   |
| HETATM | 34 | H  | UNK | 900 | -45.467 | 22.017 | -11.397 | 0.00 | 0.00 | H   |
| HETATM | 35 | H  | UNK | 900 | -43.924 | 22.428 | -10.612 | 0.00 | 0.00 | H   |
| HETATM | 36 | H  | UNK | 900 | -44.909 | 21.104 | -7.255  | 0.00 | 0.00 | H   |
| HETATM | 37 | H  | UNK | 900 | -43.633 | 21.965 | -8.137  | 0.00 | 0.00 | H   |
| HETATM | 38 | H  | UNK | 900 | -45.751 | 25.179 | -8.458  | 0.00 | 0.00 | H   |
| HETATM | 39 | H  | UNK | 900 | -45.382 | 24.508 | -10.887 | 0.00 | 0.00 | H   |
| HETATM | 40 | H  | UNK | 900 | -46.701 | 23.690 | -10.114 | 0.00 | 0.00 | H   |
| HETATM | 41 | H  | UNK | 900 | -44.982 | 23.554 | -6.657  | 0.00 | 0.00 | H   |
| HETATM | 42 | H  | UNK | 900 | -46.431 | 23.061 | -7.469  | 0.00 | 0.00 | H   |
| HETATM | 43 | H  | UNK | 900 | -45.657 | 19.348 | -9.252  | 0.00 | 0.00 | H   |
| HETATM | 44 | H  | UNK | 900 | -45.090 | 19.851 | -10.818 | 0.00 | 0.00 | H   |
| HETATM | 45 | H  | UNK | 900 | -42.744 | 20.191 | -9.886  | 0.00 | 0.00 | H   |
| HETATM | 46 | H  | UNK | 900 | -43.250 | 19.626 | -8.314  | 0.00 | 0.00 | H   |
| HETATM | 47 | H  | UNK | 900 | -42.367 | 25.882 | -7.646  | 0.00 | 0.00 | H   |
| HETATM | 48 | H  | UNK | 900 | -43.891 | 25.599 | -6.818  | 0.00 | 0.00 | H   |
| HETATM | 49 | H  | UNK | 900 | -41.864 | 17.329 | -7.962  | 0.00 | 0.00 | H   |
| HETATM | 50 | H  | UNK | 900 | -45.640 | 16.965 | -9.920  | 0.00 | 0.00 | H   |
| HETATM | 51 | H  | UNK | 900 | -46.150 | 14.960 | -8.765  | 0.00 | 0.00 | H   |
| HETATM | 52 | H  | UNK | 900 | -43.507 | 13.726 | -5.190  | 0.00 | 0.00 | H   |
| HETATM | 53 | H  | UNK | 900 | -44.186 | 11.527 | -4.758  | 0.00 | 0.00 | H   |
| HETATM | 54 | H  | UNK | 900 | -46.556 | 9.900  | -6.785  | 0.00 | 0.00 | H   |
| HETATM | 55 | H  | UNK | 900 | -47.513 | 10.867 | -5.645  | 0.00 | 0.00 | H   |
| HETATM | 56 | H  | UNK | 900 | -46.099 | 9.999  | -5.079  | 0.00 | 0.00 | H   |
| HETATM | 57 | H  | UNK | 900 | -48.030 | 11.629 | -7.775  | 0.00 | 0.00 | H   |
| HETATM | 58 | H  | UNK | 900 | -44.477 | 12.973 | -9.783  | 0.00 | 0.00 | H   |
| HETATM | 59 | H  | UNK | 900 | -49.074 | 11.184 | -9.941  | 0.00 | 0.00 | H   |
| HETATM | 60 | H  | UNK | 900 | -45.594 | 12.645 | -11.943 | 0.00 | 0.00 | H   |
